# Supplementary material for: Novel Intranasal Drug Delivery: Geraniol Charged Polymeric Mixed Micelles for Targeting Cerebral Insult as a Result of Ischaemia/Reperfusion
Source: MDPI journal article supplement (doi:10.3390/pharmaceutics12010076), 2020-01-17
Supplement: s1 [file s1]

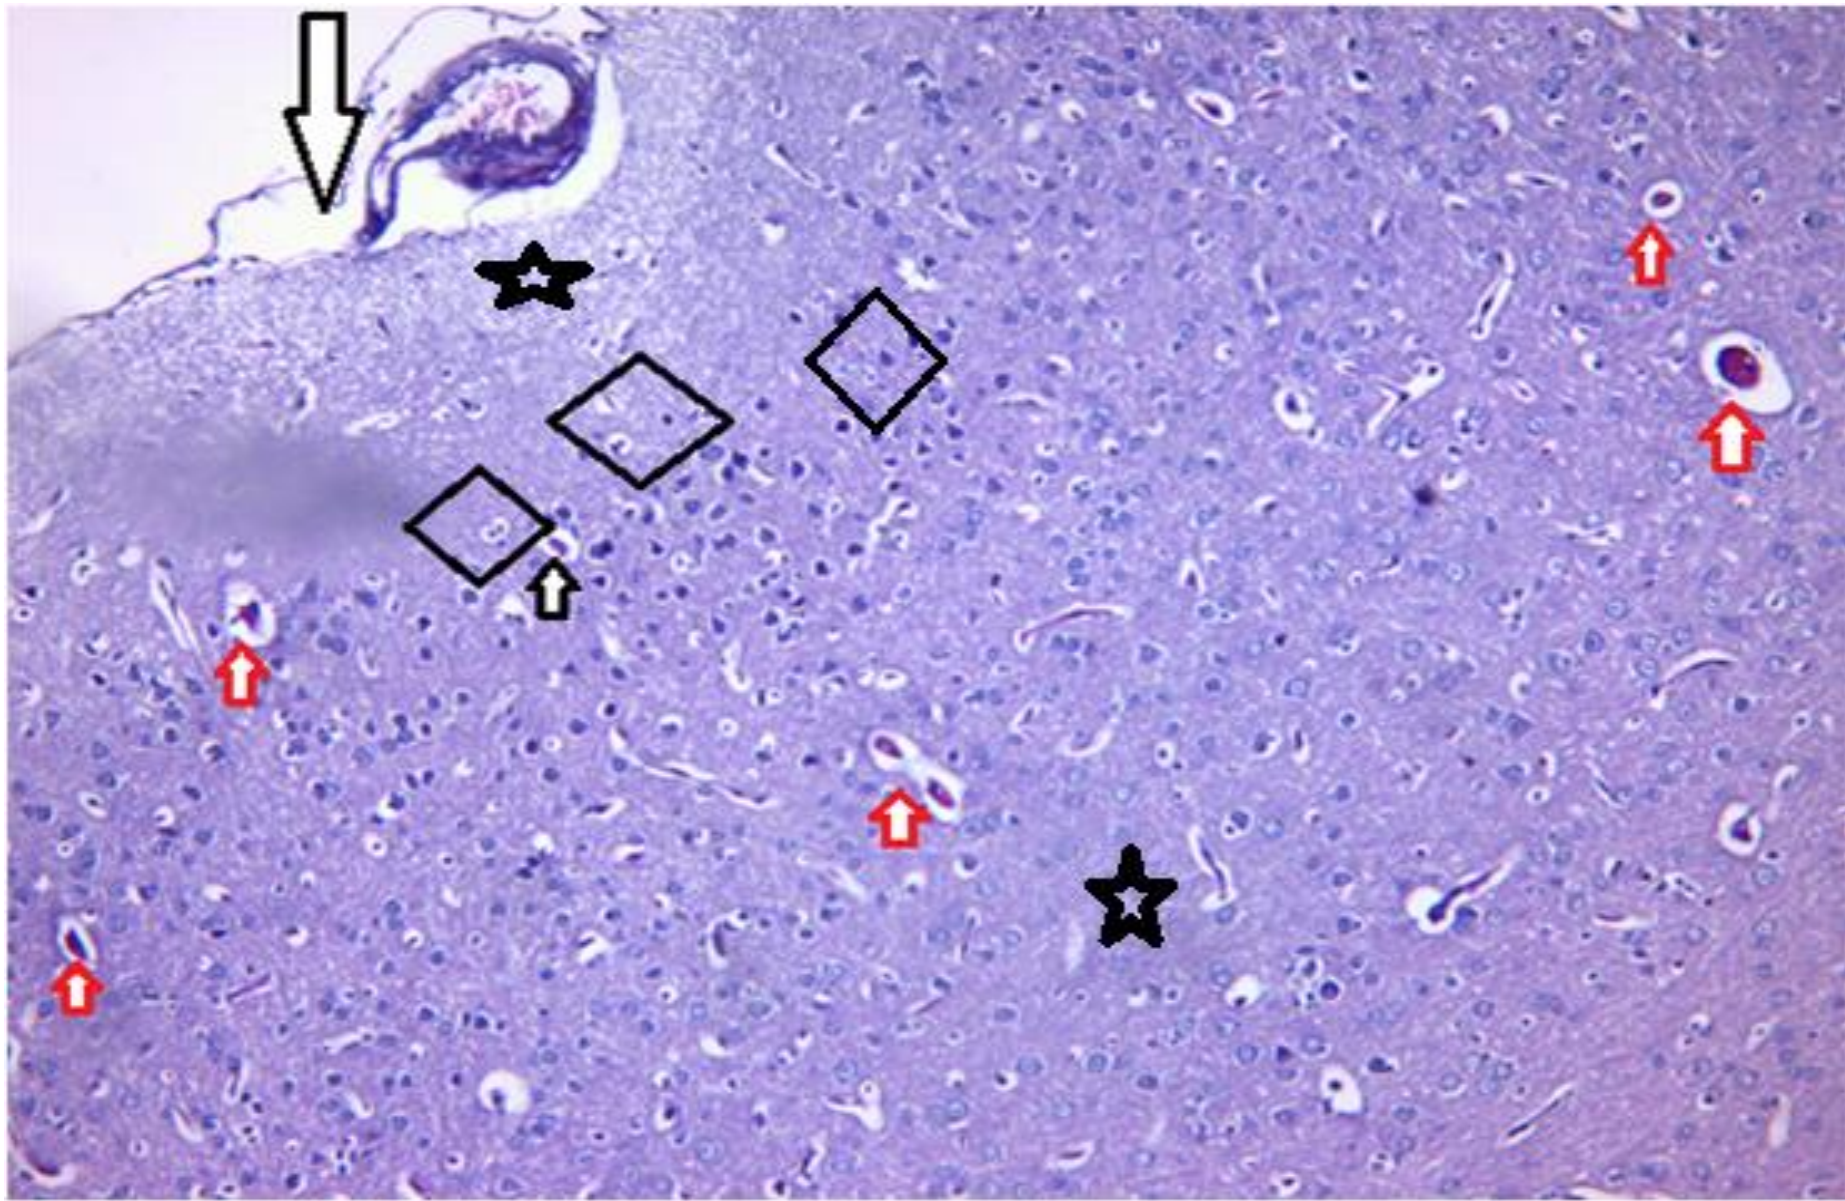

**Figure S3.** Photomicrograph of prophylactic vehicle group showed thickened and vascular pia mater (arrow), oedma under pia (star), red neuron infarction (red arrow) and many apoptotic cells
