# Supplementary material for: Novel Intranasal Drug Delivery: Geraniol Charged Polymeric Mixed Micelles for Targeting Cerebral Insult as a Result of Ischaemia/Reperfusion
Source: MDPI journal article supplement (doi:10.3390/pharmaceutics12010076), 2020-01-17
Supplement: s1 [file s1]

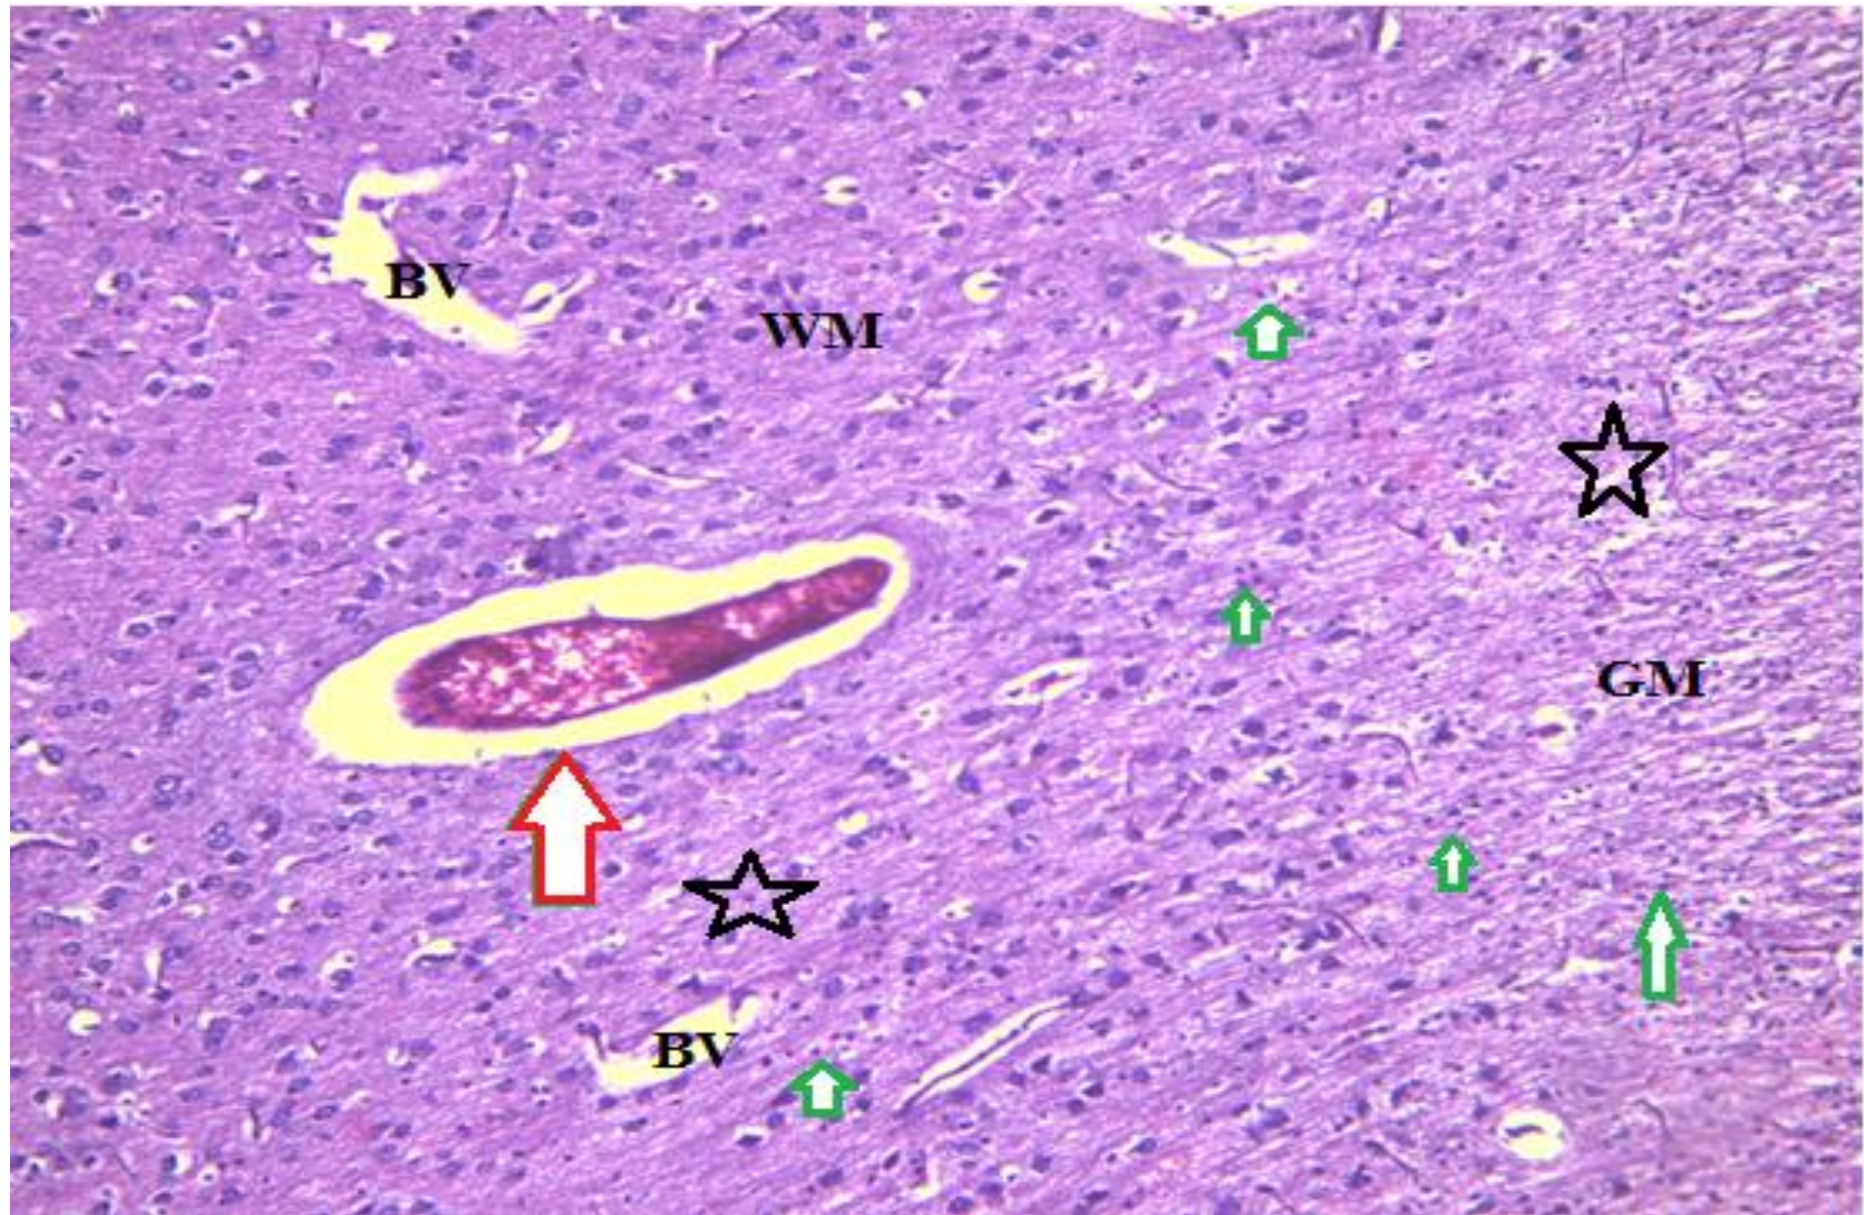

**Figure S8.** Photomicrograph of therapeutic Geraniol micelle (0.5ml) showing areas of infarction (red arrow), mild oedema (star) in both GM and WM and Cellular infiltration (green arrows)
