# Supplementary material for: Novel Intranasal Drug Delivery: Geraniol Charged Polymeric Mixed Micelles for Targeting Cerebral Insult as a Result of Ischaemia/Reperfusion
Source: MDPI journal article supplement (doi:10.3390/pharmaceutics12010076), 2020-01-17
Supplement: s1 [file s1]

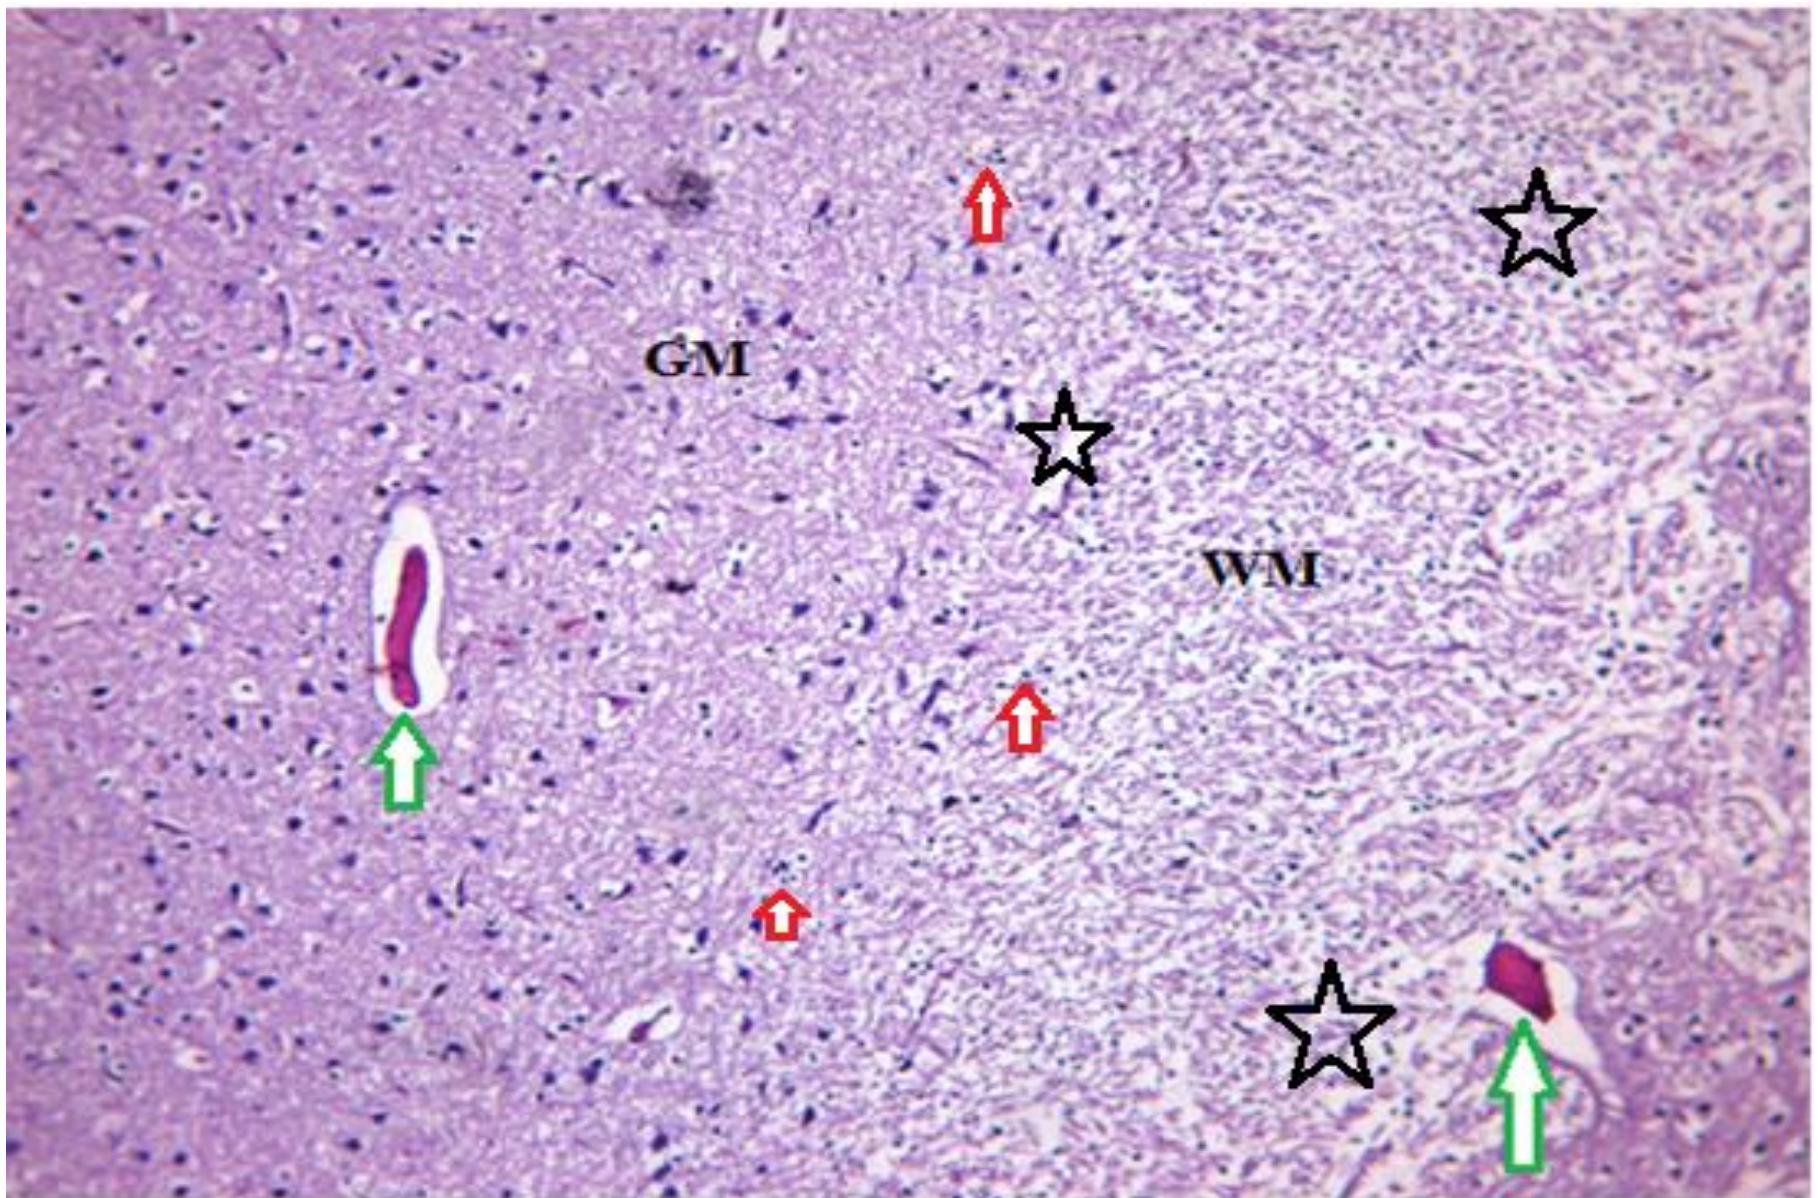

**Figure S4.** Photomicrograph of prophylactic Geraniol oil group showed infarction (green arrow) in grey matter (GM) and white matter (WM), many apoptotic and cellular infiltration (red arrow), oedema (stars)
