# Supplementary material for: Novel Intranasal Drug Delivery: Geraniol Charged Polymeric Mixed Micelles for Targeting Cerebral Insult as a Result of Ischaemia/Reperfusion
Source: MDPI journal article supplement (doi:10.3390/pharmaceutics12010076), 2020-01-17
Supplement: s1 [file s1]

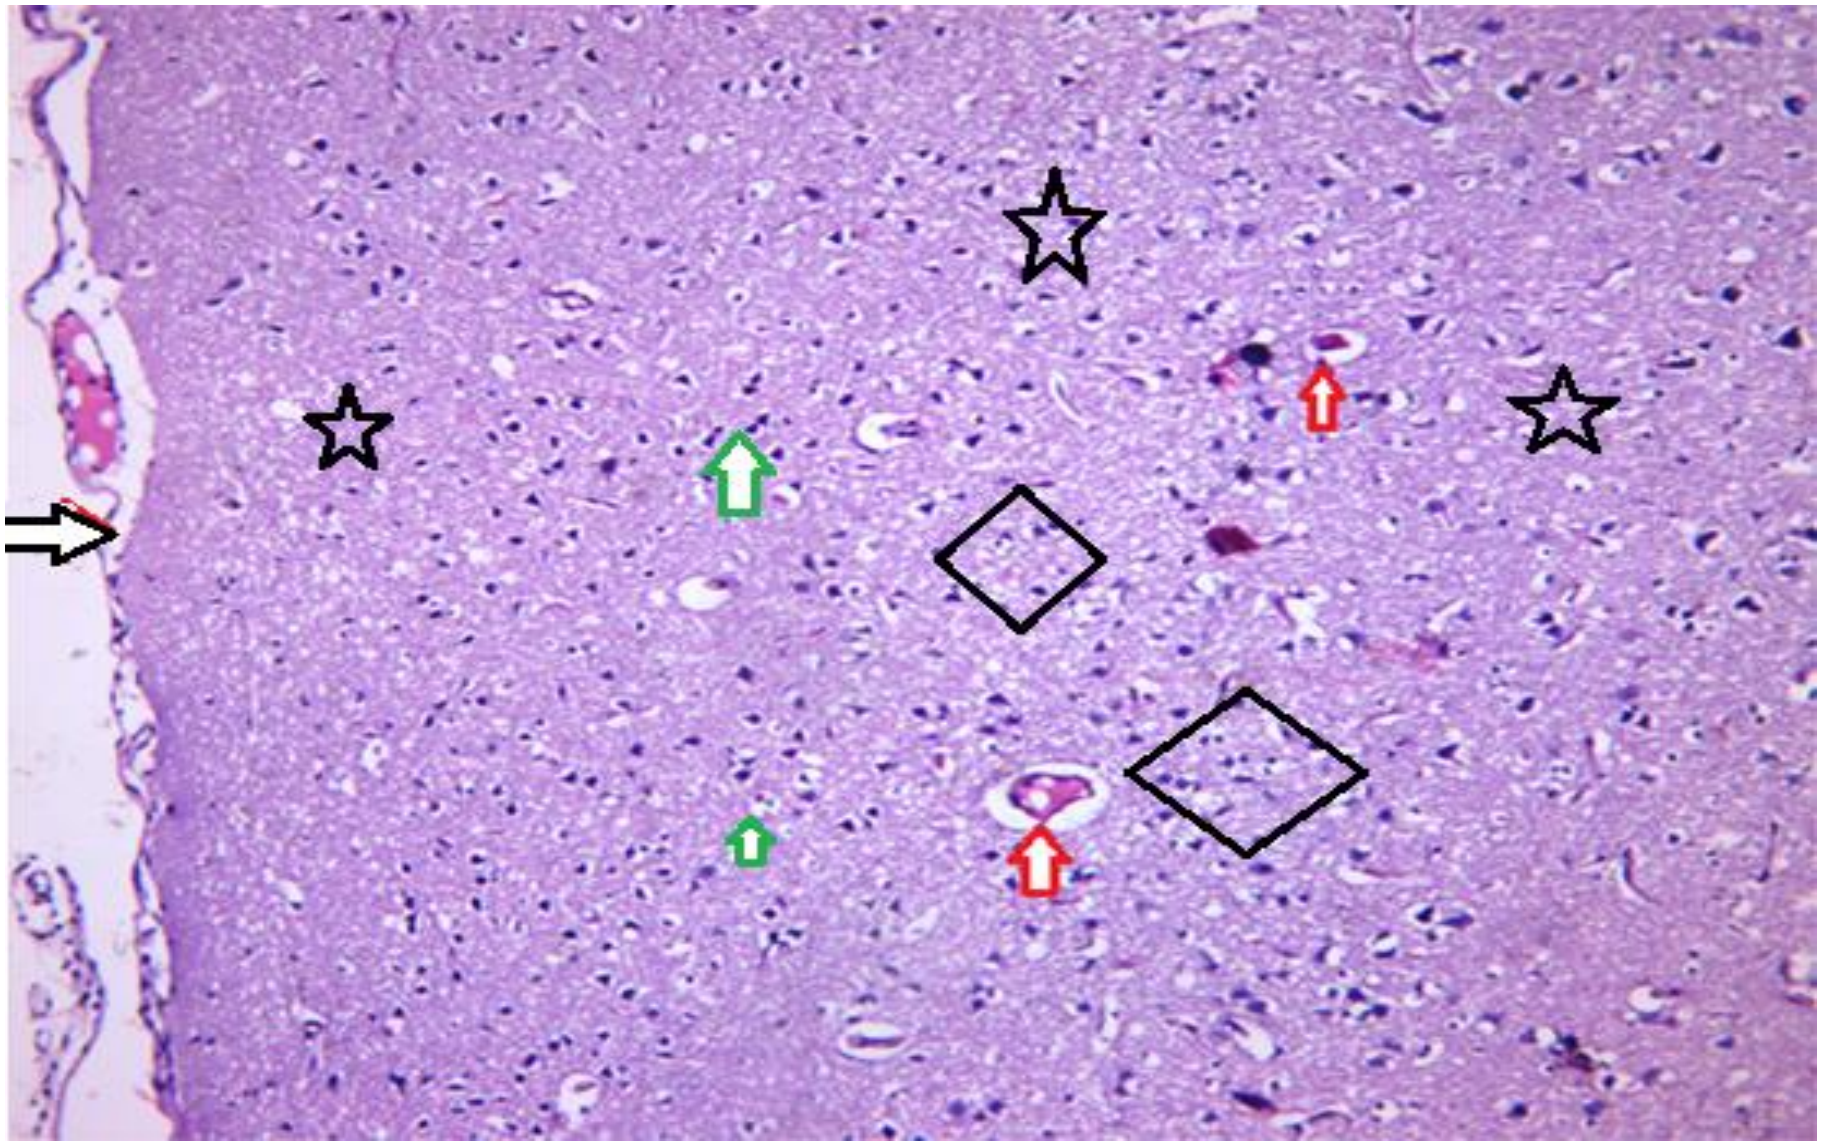

**Figure S6.** Photomicrograph of prophylactic Geraniol micelle (0.5ml) group showing pia matter with cellular infiltration, oedema (stars) red neuronal infarction (red arrow), cellular infiltration (rectangle), apoptotic and mitotic cells (green arrow)
