# Supplementary material for: Novel Intranasal Drug Delivery: Geraniol Charged Polymeric Mixed Micelles for Targeting Cerebral Insult as a Result of Ischaemia/Reperfusion
Source: MDPI journal article supplement (doi:10.3390/pharmaceutics12010076), 2020-01-17
Supplement: s1 [file s1]

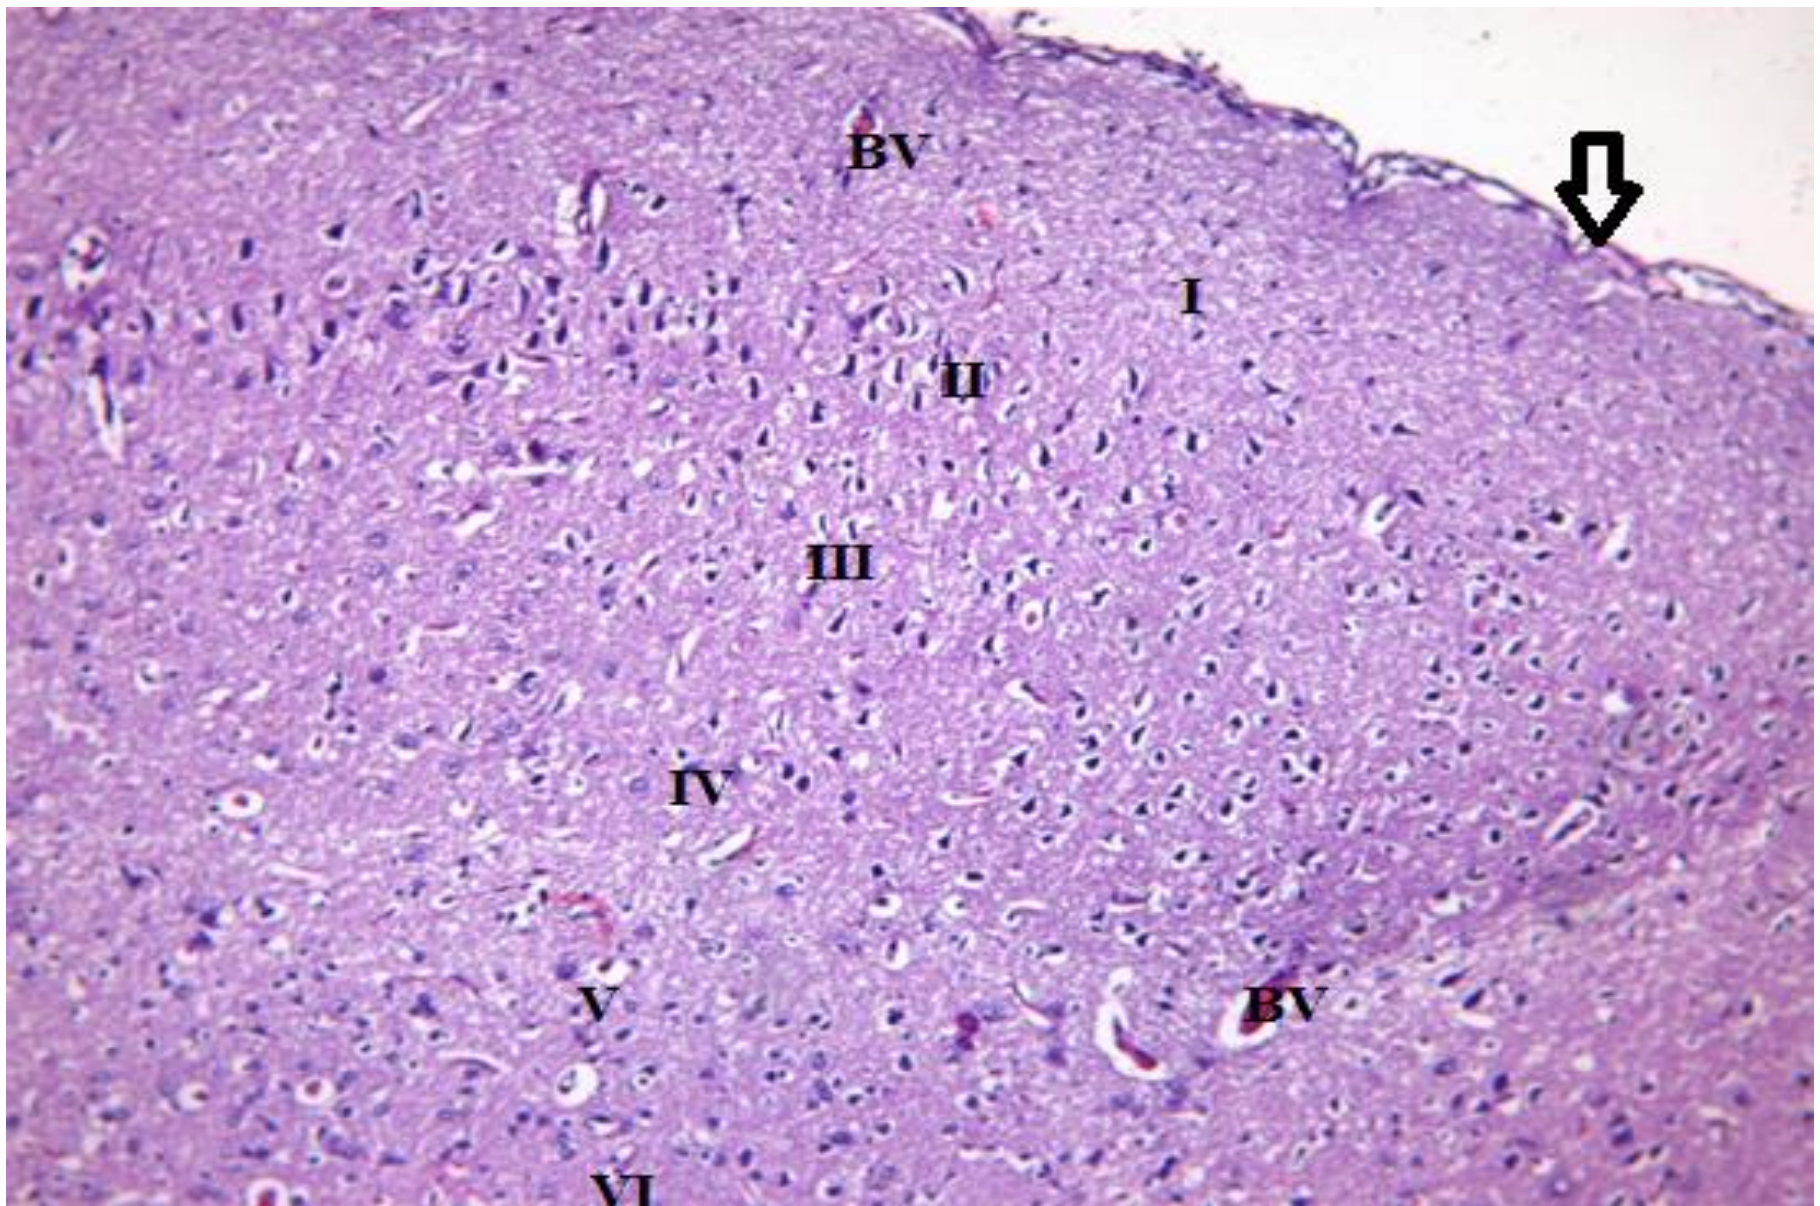

**Figure S2.** A photomicrograph of a section of cerebral cortex of sham group showing delicate layer of pia matter (arrow), outer grey matter six layers (GM) of cerebral cortex
