# Supplementary material for: Novel Intranasal Drug Delivery: Geraniol Charged Polymeric Mixed Micelles for Targeting Cerebral Insult as a Result of Ischaemia/Reperfusion
Source: MDPI journal article supplement (doi:10.3390/pharmaceutics12010076), 2020-01-17
Supplement: s1 [file s1]

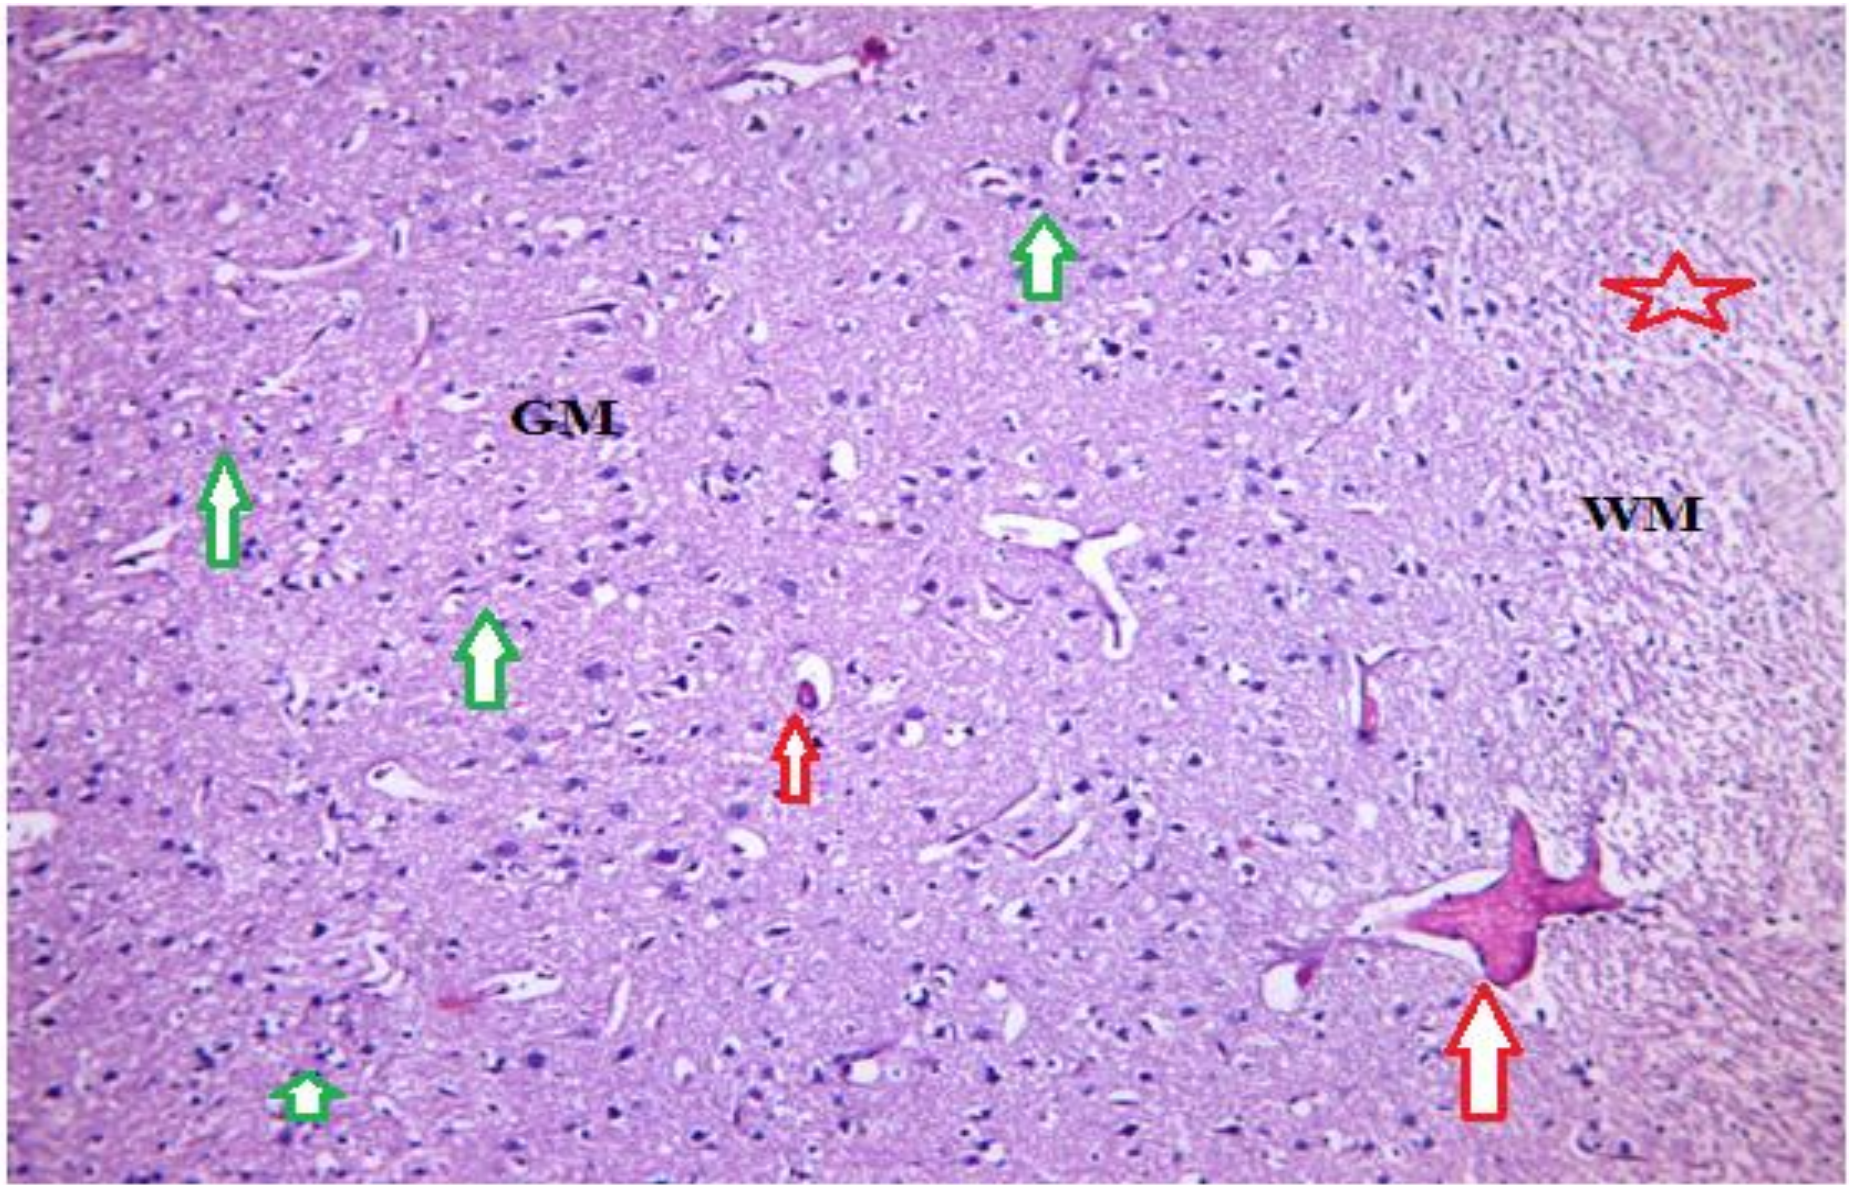

**Figure S5.** Photomicrograph of prophylactic Geraniol micelle (0.25ml) group shows infarction in small areas (red arrow), mild edema (star) mainly in white matter (WM) and increased cellular infiltration (green arrows)
